# Supplementary material for: Synthesis, Cyclic Voltammetric, Electrochemical, and Gravimetric Corrosion Inhibition Investigations of Schiff Base Derived from 5,5-Dimethyl-1,3-cyclohexanedione and 2-Aminophenol on Mild Steel in 1 M HCl and 0.5 M H2SO4
Source: Hindawi journal article supplement (doi:10.1155/2019/1094148), 2019-05-02
Supplement: f1 [file 1094148.f1.pdf]

## IR spectral studies

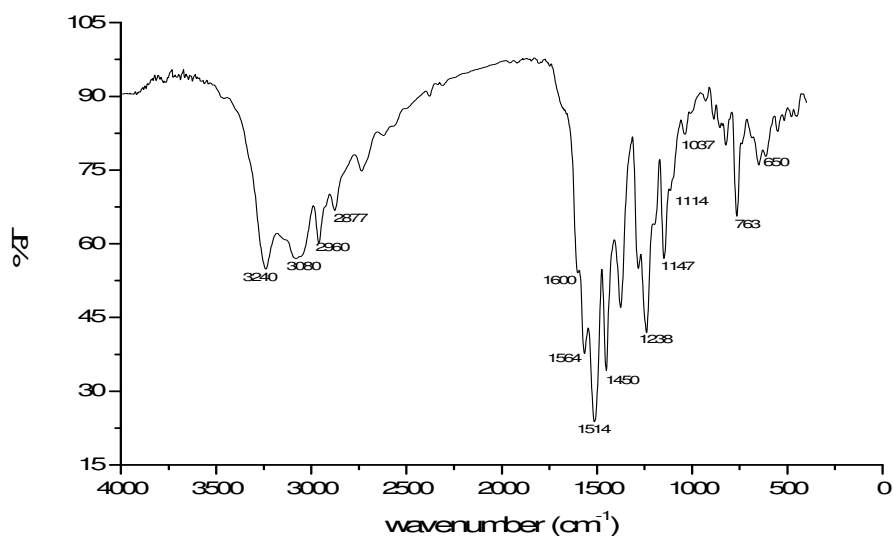

Characteristic stretching frequencies of various bonds in DmChDp were obtained from the IR spectrum. The azomethine moiety (C=N) was identified by the peak at  $1600\text{cm}^{-1}$ . A band at  $3080\text{cm}^{-1}$  was due to the aromatic C-H bond stretching vibration.  $\nu_{\text{C-O}}$  was observed at  $1238\text{cm}^{-1}$ .  $\nu_{\text{C=C}}$  stretching vibration of the aromatic ring was observed at  $1564$  and  $1514\text{cm}^{-1}$ . A band at  $3240\text{cm}^{-1}$  indicates the stretching vibration of OH group. The C-H bond involving  $\text{sp}^3$  hybridized carbon gave characteristic bands at  $2960$  and  $2877\text{cm}^{-1}$ . A peak at  $1450\text{cm}^{-1}$  corresponds to C-H bending vibration. In plane deformation was observed at  $1147$ ,  $1114$  and  $1037\text{cm}^{-1}$ . Out of plane deformation was observed at  $763$  and  $650\text{cm}^{-1}$ .

## <sup>1</sup>H NMR spectral studies

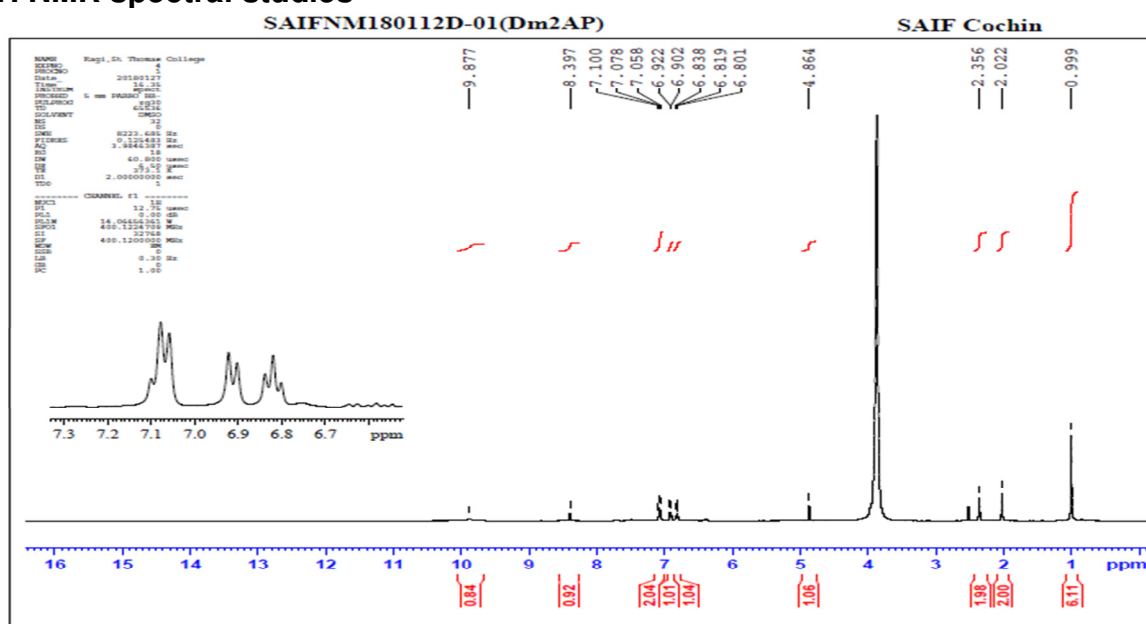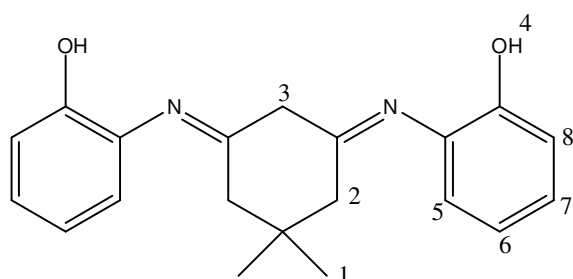

| Labelled number                                     | $\delta$ value |
|-----------------------------------------------------|----------------|
| 1                                                   | 0.999          |
| 2                                                   | 2.022          |
| 3                                                   | 2.356          |
| 4                                                   | 9.877          |
| 5-8                                                 | 6.819-7.078    |
| $\delta_{\text{NH}}$<br>(tautomeric form)           | 8.397          |
| $\delta_{\text{CH(olefinic)}}$<br>(tautomeric form) | 4.864          |

Eight non-equivalent hydrogen atoms which were in different electronic environments gave characteristic peaks in the NMR spectrum. A peak obtained at 0.999 $\delta$  can be assigned to  $\text{CH}_3$  group present in the cyclohexane ring. The  $\text{CH}_2$  group adjacent to the carbon containing  $\text{CH}_3$  group showed a peak at 2.022  $\delta$ . The peak at 2.356  $\delta$  is assigned to the proton present in the carbon between two azomethine moiety. A broad peak at 9.877  $\delta$  corresponds to OH proton. The aromatic protons gave characteristic peaks at 6.819-7.078  $\delta$ . The appearance of a weak signal at 8.397  $\delta$  due to the NH proton and peak at 4.864  $\delta$  due to olefinic CH confirmed the existence of tautomerism.

### <sup>13</sup>C NMR spectral studies

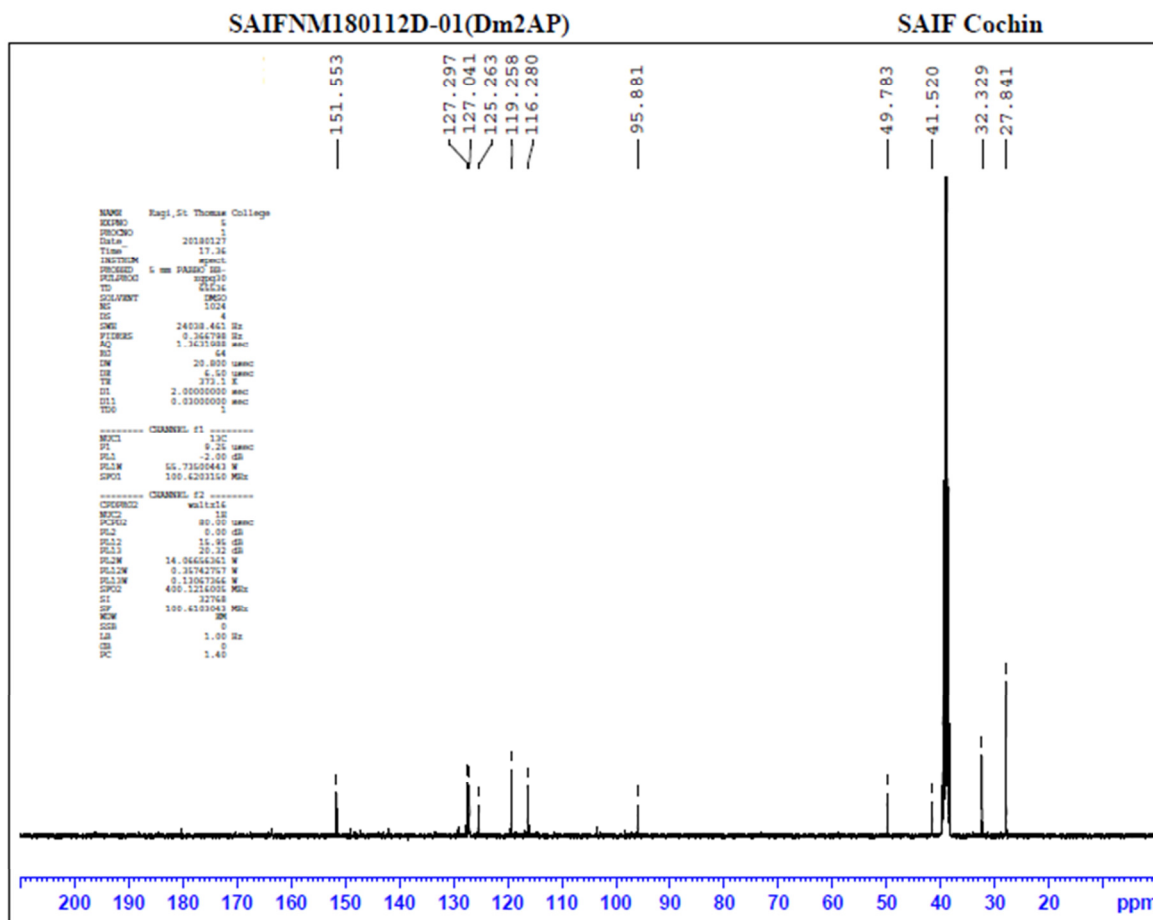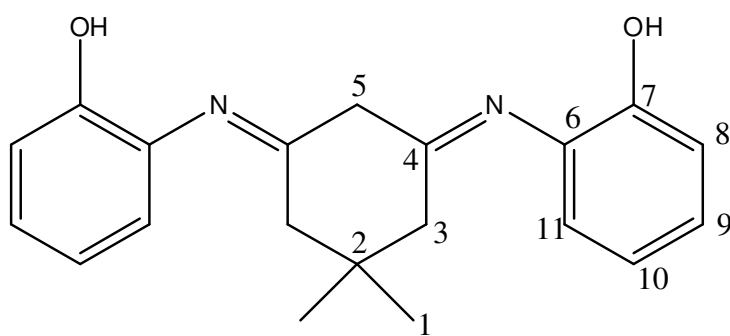

| Labelled number | $\delta$ value  |
|-----------------|-----------------|
| 1               | 27.841          |
| 2               | 41.520          |
| 3               | 32.329          |
| 4               | 95.881          |
| 5               | 49.783          |
| 6-11            | 116.280-151.553 |

The presence of eleven chemically different carbon atoms was confirmed by this spectrum. The azomethine carbon was identified at 95.88ppm. The aromatic carbons of the benzene ring exhibited six signals in the range 116.28-151.55ppm. Methylene carbon atoms labelled 3 and 5 exhibited their peaks at 32.329ppm and 49.783 respectively. Methyl carbon atom exhibited a signal at 27.841ppm.

## Mass spectral studies

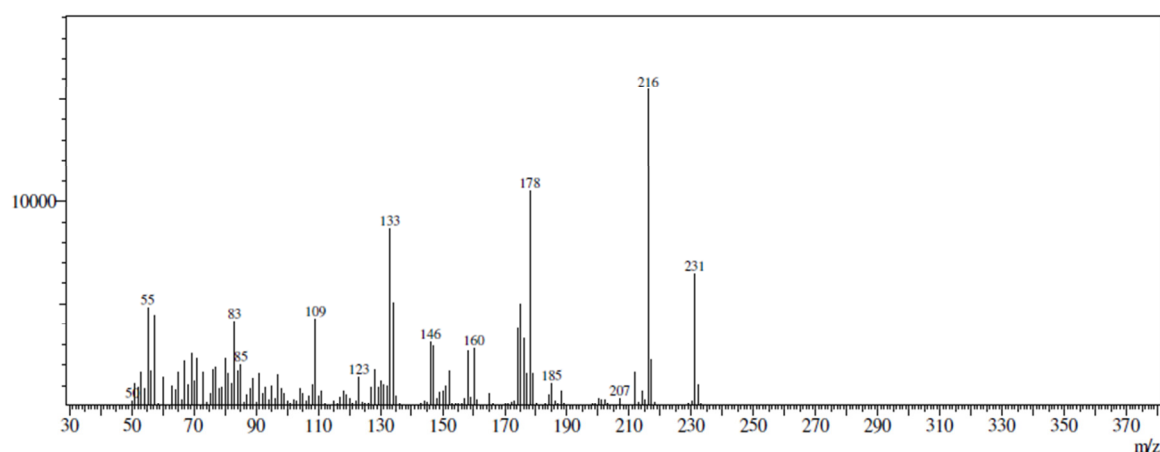

| m/z value | Fragment                                                     |
|-----------|--------------------------------------------------------------|
| 231       | $[\text{C}_{14}\text{H}_{19}\text{N}_2\text{O}]^+$           |
| 216       | $[\text{C}_{14}\text{H}_{18}\text{N}_2\text{O}]^+$ BASE PEAK |
| 178       | $[\text{C}_{11}\text{H}_{16}\text{NO}]^+$                    |
| 160       | $[\text{C}_9\text{H}_8\text{N}_2\text{O}]^+$                 |
| 146       | $[\text{C}_9\text{H}_{10}\text{N}_2]^+$                      |
| 133       | $[\text{C}_8\text{H}_7\text{NO}]^+$                          |
| 109       | $[\text{C}_6\text{H}_9\text{N}_2]^+$                         |

Molecular ion peak at m/z 322 was absent. Base peak was observed at m/z 216, which is formed by the loss of amino phenolic moiety from the molecule. Loss of one phenolic moiety resulted with a peak at m/z 231 which corresponds to  $[\text{C}_{14}\text{H}_{19}\text{N}_2\text{O}]^+$ . Peaks at m/z 178, 160, 146, 133 and 109 were due to the fragments  $[\text{C}_{11}\text{H}_{16}\text{NO}]^+$ ,  $[\text{C}_9\text{H}_8\text{N}_2\text{O}]^+$ ,  $[\text{C}_9\text{H}_{10}\text{N}_2]^+$ ,  $[\text{C}_8\text{H}_7\text{NO}]^+$  and  $[\text{C}_6\text{H}_9\text{N}_2]^+$  respectively.
